# Supplementary material for: A new method for assessing plant lodging and the impact of management options on lodging in canola crop production
Source: PubMed Central journal article supplement (PMC4995411; doi:10.1038/srep31890), 2016-08-24
Supplement: srep31890-s1.pdf [file srep31890-s1.pdf]

**A new method for assessing plant lodging and the impact of management options on lodging in canola crop production**

Wei Wu<sup>1,2</sup> & Bao-Luo Ma<sup>1,\*</sup>

<sup>1</sup>Ottawa Research and Development Centre, Agriculture and Agri-Food Canada, 960 Carling Ave, Ottawa, ON, K1A 0C6, Canada

<sup>2</sup>College of Agronomy, Northwest A&F University, Yangling 712100, Shaanxi, China

\* To whom correspondence should be addressed. E-mail: [Baoluo@agr.gc.ca](mailto:Baoluo@agr.gc.ca) (B. Ma). Tel.: +01 613-759-1521; Fax: +01 613-759-1701.

## **Appendix I:**

### **Theoretical hypothesis regarding the relationships between the electrical measurements and anchorage strength ( $S_p$ )**

Several crop lodging models were used to interrelate and assess the biomechanical properties that explain lodging, as mentioned in the Introduction section. According to the concepts used in their models, the lodging resistance of a plant depends on the following three main factors: (1) the extent of the forces that the plant is subjected to; (2) the maximum stem bending strength  $S_s$  for resisting buckling; and (3) the maximum root anchorage strength  $S_p$  for resisting overturning when an external force is applied<sup>21,39</sup>.

Root lodging, caused by anchorage failure is considered more prevalent than stem lodging (see Introduction section and our experimental verification). Herein, we only consider  $S_p$  and determine its possible relationship with electrical measurements.

Anchorage failure involves bending of the roots at their base (please see the deformation of lateral and tap root systems shown in Fig. 10b relative to Fig. 10a) and axial movement of the leeward and windward roots through the root–soil plate rotation (the colored circle representing movement as a plant overturns in Fig. 10b relative to Fig. 10a). The total root restoring strengths from these motions provide a bending moment to resist root lodging. This root lodging anchorage model was proposed by Ennos<sup>10</sup> who hypothesized that the total  $S_p$  includes two separate components, the resistance of the root to bending and the resistance of the root to axially movement through the soil media.

$$S_p = M_b + M_a \quad (1)$$

where  $S_p$  is the total anchorage strength (Nm);  $M_b$  is the root bending strength (Nm); and  $M_a$  is the root resistance to axial motion (Nm).

The experimental results of Ennos<sup>10</sup> further supported this anchorage model and suggested that the two components of the model are approximately equal in magnitude.

$$M_a = M_b \quad (2)$$

In Ennos's model, each individual root is considered as a standard and lignified cylinder that emerges from the base of the stem at a certain angle,  $\phi$ , and a vertical angle of  $\lambda$  from the plane of the lodging force applied (supplementary Fig. S9). A distance of  $L_{\text{perp}}$  from the lodging plate will be projected, as shown in supplementary Fig. S9, and the perpendicular distance,  $L_{\text{par}}$ , will be calculated as  $L\sqrt{(1 - \sin^2\phi \sin^2\lambda)}$  using the Pythagorean theorem. Lignified roots are stiff and resist bending. Thus, a perpendicular force,  $F$ , must be applied to the root tip to bend it to an angle of  $\alpha$ . When the base of the stem was rotated by this angle, the root retained its orientation and bent at its base at an angle of  $\beta$ , which was equal to  $\alpha\sqrt{(1 - \sin^2\phi \sin^2\lambda)}$ . Then, the resistance force,  $f$ , at the tip of the root could be calculated as follows according to Hooke's law  $F\sqrt{(1 - \sin^2\phi \sin^2\lambda)}$ .

This resistance force was applied at a perpendicular distance of  $L_{\text{par}}$  from the axis of rotation. Thus, this bending moment can be calculated as  $m_b = f L_{\text{par}}$ . Then, the bending moment of each individual root can be calculated as follows:

$$m_b = FL(1 - \sin^2\phi \sin^2\lambda) \quad (3)$$

Because individual roots can be subjected to three-point bending tests, the maximum force  $F$  (N) that the root can withstand before falling can be estimated as follows:

$$F = k \times BS \times SM \quad (4)$$

where  $k$  is the reciprocal of the distance (mm) between the supports in the three-point bending test;  $BS$  is the bending stress ( $\text{N mm}^{-2}$ ); and  $SM$  is the section modulus ( $\text{mm}^3$ ). The root morphology can be recognized as a standard solid circle; thus,  $SM = \pi d^3/32$ , where  $d$  is the radius

of the root. Then, equation (3) can be written as follows:

$$m_b = k \times \pi \times BS \times d^3 \times L (1 - \sin^2 \phi \sin^2 \lambda) / 32 \quad (5)$$

The total anchorage component,  $M_b$ , of the root bending moment is the sum of all of the individual roots.

$$M_b = \sum_{i=1}^n k \pi BS d^3 L_i (1 - \sin^2 \phi_i \sin^2 \lambda_i) / 32 \quad (6)$$

By combining equations (1) and (2), the total anchorage strength  $S_p$  can be estimated as follows:

$$S_p = \sum_{i=1}^n k \pi BS d^3 L_i (1 - \sin^2 \phi_i \sin^2 \lambda_i) / 16 \quad (7)$$

We hypothesize that  $BS$  is a function of the cell wall components, such as cellulose and lignin, and could be constant<sup>13</sup>. Therefore, if the roots are disturbed symmetrically in the soil at the base of the plant,  $S_p$  will mainly depend on the radius, length and spreading angle of an individual root under certain directions in which the lodging force is applied.

If we consider the root area ( $A$ , the macro-scale geometrical surface area defined by  $2\pi dL$ ) or root volume ( $V$ ) as an independent variable, equation (7) becomes

$$S_p = \sum_{i=1}^n \frac{k BS A^3 (1 - \sin^2 \phi_i \sin^2 \lambda_i)}{128 \pi^2 L_i^2} \quad (8)$$

$$\text{or } S_p = \sum_{i=1}^n k BS \sqrt{V_i / \pi L_i} V_i (1 - \sin^2 \phi_i \sin^2 \lambda_i) / 16 \quad (9)$$

Dalton<sup>28</sup> developed a conceptual model for estimating root morphology in terms of the  $A$ ,  $V$  and biomass by using the root  $C$ , which is measured by inserting one electrode at the base of the stem and one electrode in the rooting soil. This method is based on measuring the electrical  $C$  of an equivalent parallel resistance-capacitance circuit formed by the interface between the root and soil solution surface. Several researchers have observed strong correlations between root  $C$  and root biomass<sup>24-26</sup>.

According to Dalton's model<sup>28</sup> root tissue segments resemble axially symmetric cylinders and

are considered as a standard and lignified cylindrical condenser with length,  $L$ , and dielectric constant,  $\epsilon_i$ . Dalton's model indicated the presence of an inner cylindrical conductive condenser with an effective radius of  $r_{i1}$  for xylem section separated by root tissues whose outer surface was in contact with an exterior conductor (water or nutrient solution) at an effective radius of  $r_{i2}$ . In this case,  $C$  is given as

$$C_i = \frac{\epsilon_i A}{4\pi \ln \left[ \frac{r_{i2}}{r_{i1}} \right] r_{i2}} \quad (10)$$

This equation shows that the root  $A$  for each root section is positively correlated with the root  $C$ . The total effective  $C$  is additive with respect to each root section, thus, equation (10) can be written as

$$C = \sum_{i=1}^n \frac{\epsilon_i A_i}{4\pi \ln \left[ \frac{r_{i2}}{r_{i1}} \right] r_{i2}} \quad (11)$$

As  $r_{i1}$  boundlessly approaches  $r_{i2}$  where the separation  $d_i$  is equal to  $r_{i2}$  by subtracting  $r_{i1}$ , equation (11) can be revised as follows:

$$C = \sum_{i=1}^n \frac{\epsilon_i A_i}{4\pi d_i} \quad (12)$$

If Dalton's and Ennos's models are combined, the relationship between  $S_p$  and root  $C$  becomes

$$S_p = \sum_{i=1}^n \frac{\kappa \pi B S d^3 C^3 (1 - \sin^2 \phi_i \sin^2 \lambda_i)}{2 \epsilon^3 L^2} \quad (13)$$

Equation (13) shows that a positive relationship exists between  $S_p$  and root  $C$ . Except for root  $C$ , which has been employed to assess root morphology parameters, such as the root biomass,  $L$ ,  $A$ ,  $V$  and function,  $C$  measurements can be used to assess environmental stress conditions (such as hypoxia and anoxia) or abiotic stresses (such as drought and heat). Associated investigations of electrical measurement have also been conducted to evaluate freeze or cold injury<sup>45</sup>.

Conversely, as shown for root  $C$ , root  $Z$  is basically the resistance between the alternating current

when the current passes from the root–soil system. The root  $Z$  is inversely proportional to its root  $C$ . A detailed theoretical description of root  $Z$  is presented in other study<sup>29</sup>. According to its theoretical model<sup>29</sup>, root  $Z$  can be calculated as follows:

$$Z = \frac{\rho_{root} L_{mean}}{A} \xi \eta \zeta \quad (14)$$

where  $\rho_{root}$  is the electrical resistivity of the root interface and is equal to the resistivity of the soil near the root interface;  $L_{mean}$  is the average length of the root segments;  $A$  is the surface area of the root segment; and the dimensionless coefficient  $\xi$  considers the mutual electric shielding effects of the roots. The dimensionless coefficient  $\eta$  represents the possible effects of mechanical root injury; the dimensionless coefficient  $\zeta$  indicates a negative error when assessing the absorbing root surfaces due to other electric currents flowing through various pathways rather than through the measured root segment. These values are generally approximately 1<sup>29</sup>

If equation (14) is combined with equation (8), then  $S_p$  can be calculated as follows:

$$S_p = k BS \rho_{root}^3 L \xi^3 \eta^3 \zeta^3 \frac{(1 - \sin^2 \phi_i \sin^2 \lambda_i)}{128 \pi^2 Z^3} \quad (15)$$

Although the models of Dalton, Ennos, Aubrecht *et al.*<sup>10,28-29</sup> were not developed for canola, these models' concept can be applied and analogized to canola plant according to those theoretical bases.

Goodman *et al.*<sup>6</sup> developed a simple model for the anchorage failure of oilseed rape. By contrast with wheat and rice, which have fibrous root systems, oilseed rape has a tap root system with few laterals roots. Thus, they suggested that the roots of oilseed rape plants were anchored mainly by a rigid tap root rather than by lateral roots. These authors suggested that two components exist for  $S_p$ , the resistance of the tap root to bending below the soil surface and the restoring force of the soil to lateral compression. Because laterals roots were ignored, the first components can be simplified as follows based on equation (5):

$$M_b = k \times \pi \times BS \times d^3 \times L / 32 \quad (16)$$

where the tap root is considered as a rigid rod of length L and radius d.

The second component of anchorage failure is based on engineering theory and can be predicted as follows:

$$M_a = 9\tau dL^2 \quad (17)$$

$$S_p = M_a + M_b = k \times \pi \times BS \times d^3 \times L / 32 + 9\tau dL^2 \quad (18)$$

If A and V are treated as independent variables, equation (18) can be rewritten as equations (19) and (20), respectively.

$$S_p = \frac{k \times BS \times d \times A}{64} + \frac{9L\tau A}{2\pi} \quad (19)$$

$$S_p = \frac{k \times BS \times d \times V}{32} + \frac{9\tau V^2}{d^3 \pi^2} \quad (20)$$

Thus, by combining equations (19) and (20) with equations (12) or (14), we can obtain equations similar to equations (13) and (15) and illustrate the relationship of  $S_p$  with root C and Z.

This section suggests that  $S_p$  is related to the root diameter, L, its geometrical construction (Equation 7), and therefore to root A and V (Equation 8, 9, 19 and 20), which can be represented with some indicator in terms of root C or Z (Equation 13 and 15). These relationships provide a theoretical basis for the relationship between  $S_p$  and the electrical measurements. Generally,  $S_p$  is positively correlated with electrical C and negatively correlated with Z, as shown in the equations presented above.

Furthermore, other variable parameters may exist (such as BS, d, L,  $\epsilon_i$ ,  $\tau$ ) that influence the relationships of  $S_p$  with electrical measurements. However, these traits behave in a conservative manner and in proportion to root size in a fairly uniform manner. Keeping this opinion in mind, these simple models partially link root C to root morphological parameters, such as root radius, length, A, V and  $S_p$ . It should be noted that the above hypothesis is based on the assumption of

constant constructional characteristics. For example, enlarging the angular spread of the lateral roots vertically could strengthen  $S_p$  without much investment in root biomass<sup>5</sup>, which would not increase the L, A, V and corresponding root C but would allow most of these traits to remain constant (except for Goodman's model excluding lateral roots' contribution to  $S_p$ ). The actual behaviors of their relationships remain to be shown experimentally under field conditions.



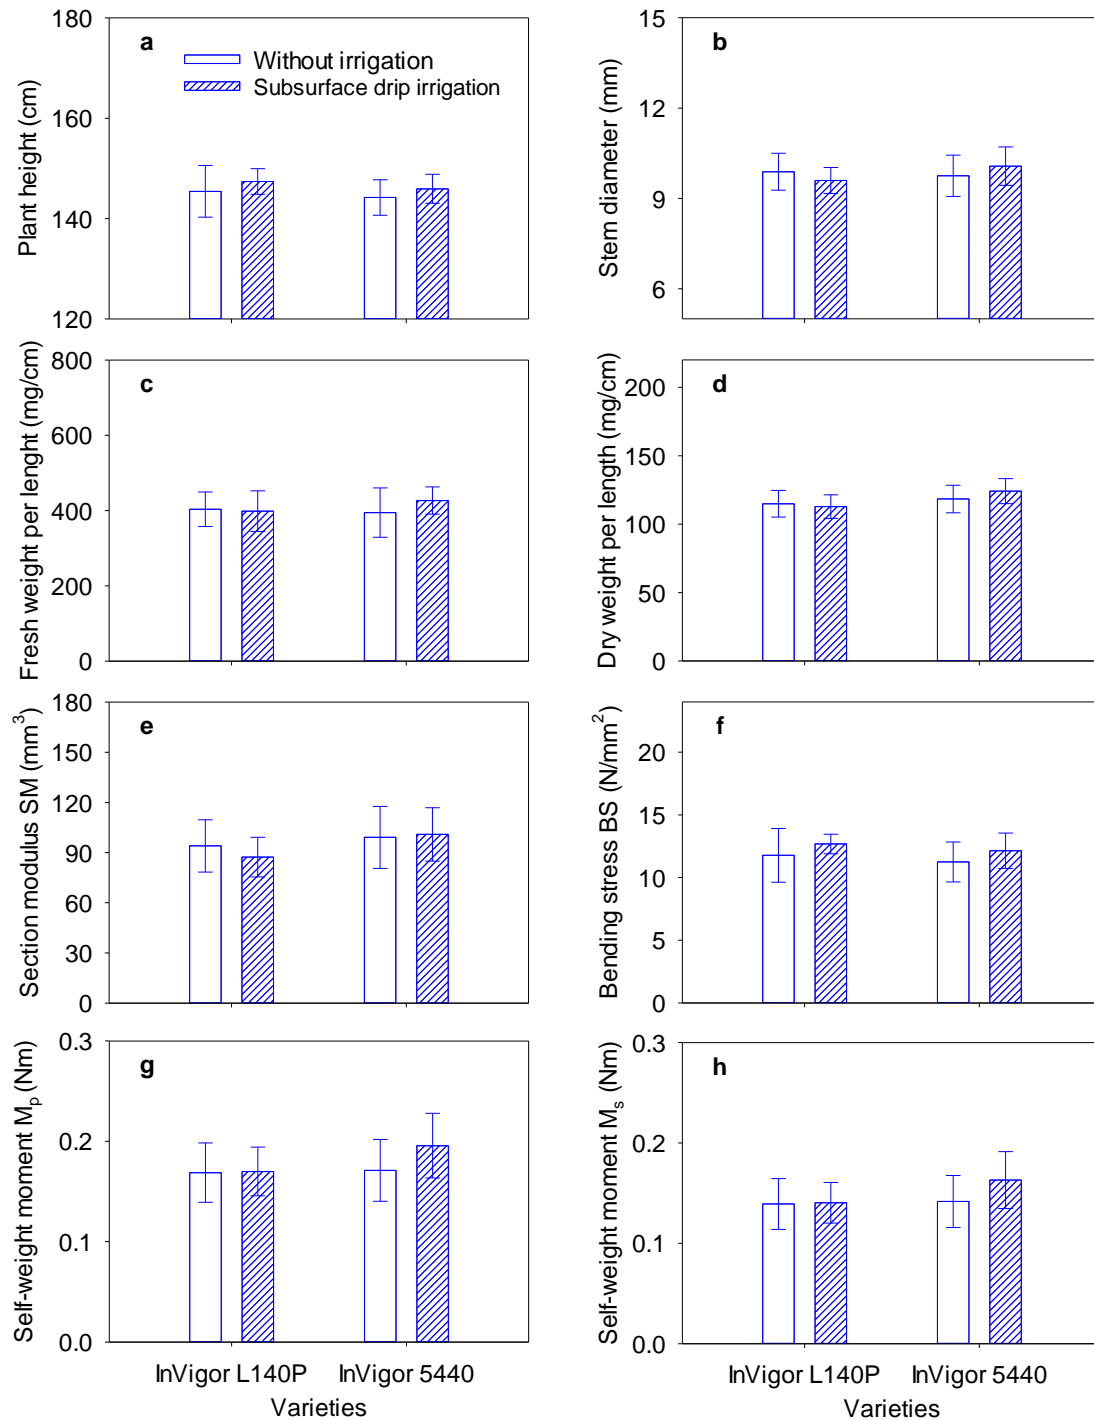

**Fig. S1.** Effect of irrigation regime on plant height (a), stem diameter (b), fresh weight per length (c), dry weight per length (d), section modulus (e), bending stress (f), self-weight moment  $M_p$  (g) and self-weight moment  $M_s$  (h) between two varieties of canola in 2015. Vertical bars above mean values indicate standard error of three replications. Significant differences between two irrigation regimes or between two varieties were not found according to LSD (0.05).

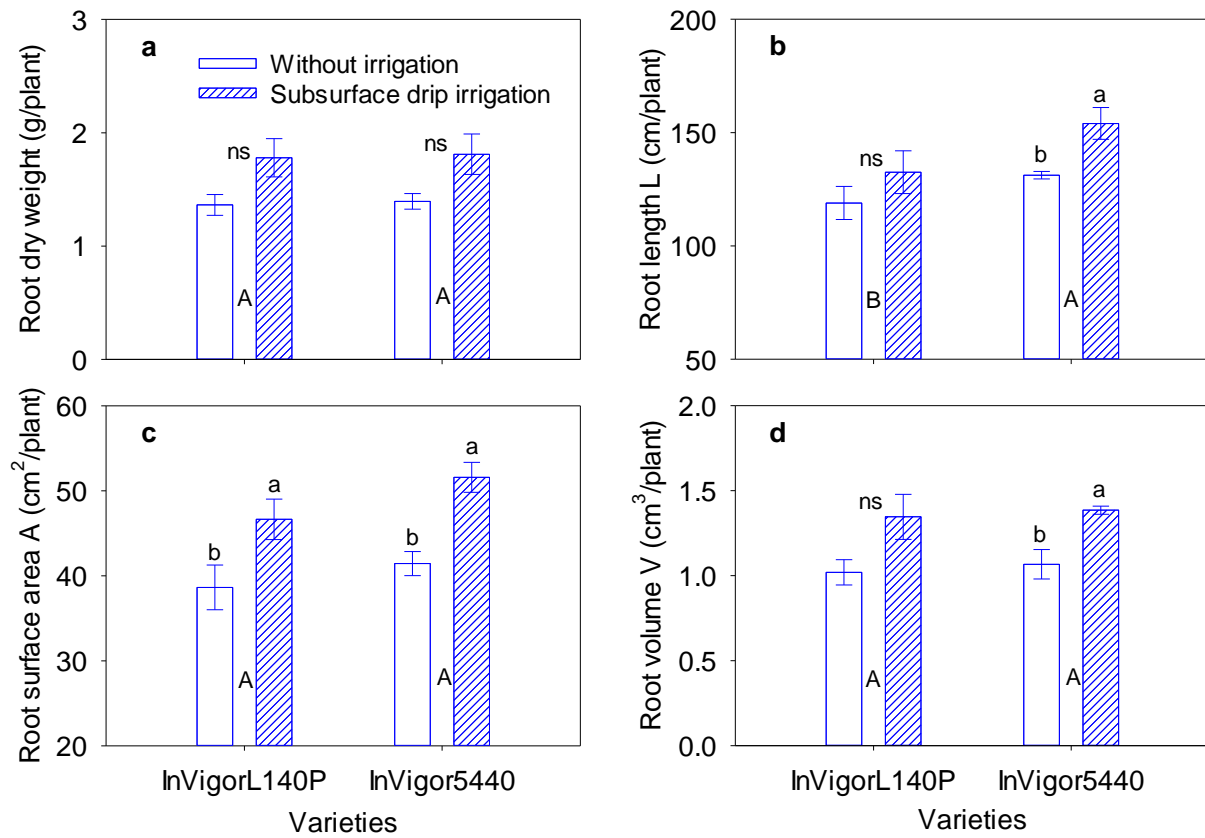

**Fig. S2.** Effect of irrigation regime on root dry weight (a), root length (b), root surface area (c), and root volume per plant (d) between two varieties of canola in 2015. Vertical bars above mean values indicate standard error of three replications. Means with different small alphabetical letters show the significant differences between two irrigation regimes for each variety according to LSD (0.05); otherwise “ns” indicates non-significant. Means with different capital alphabetical letters show the significant differences between two varieties according to LSD (0.05).

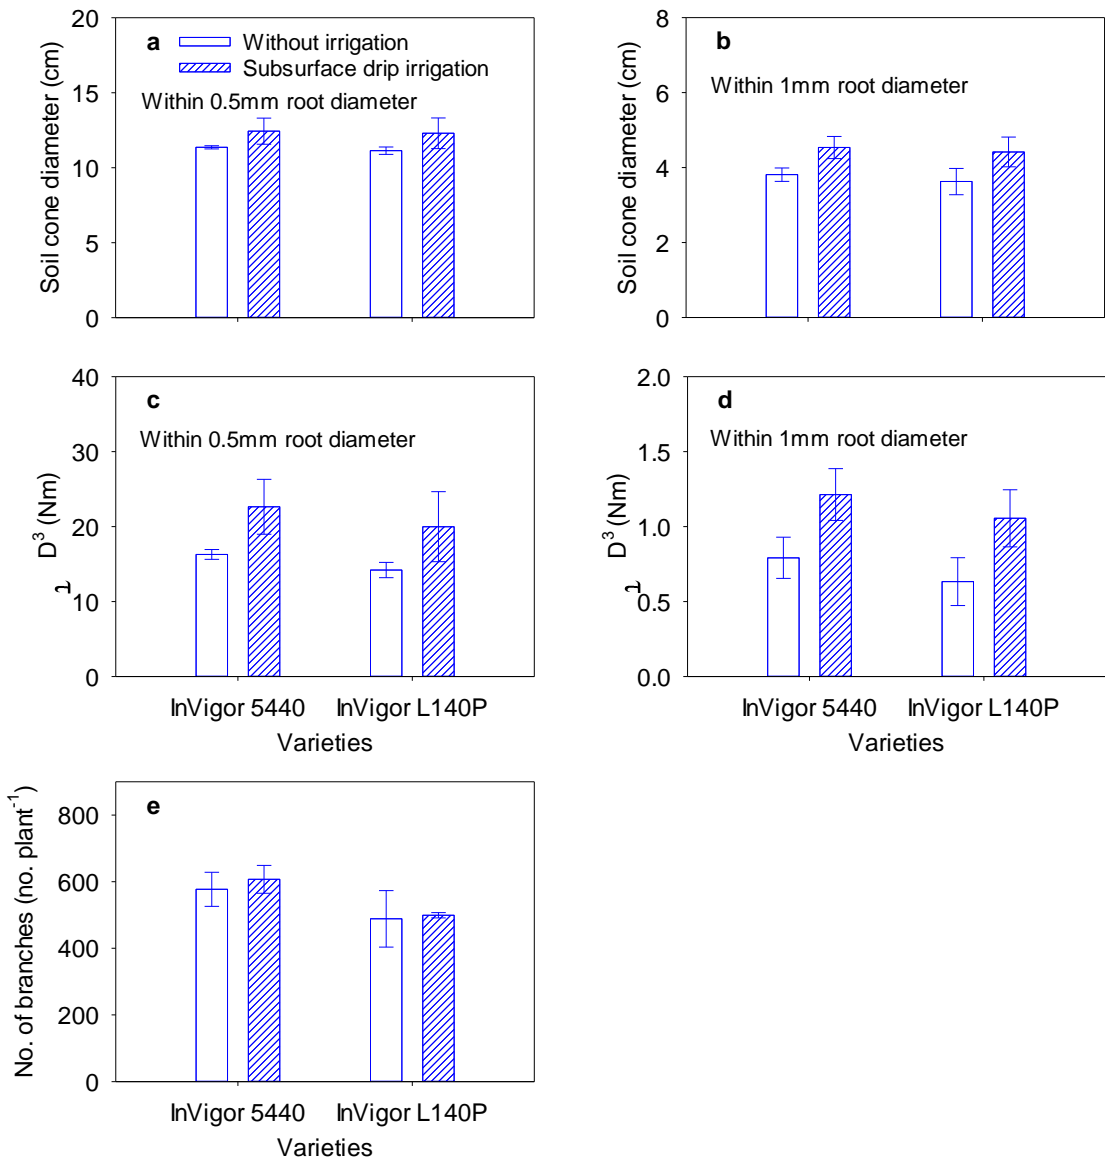

**Fig.S3.** Effect of irrigation regime on soil cone diameter (a and b),  $\tau D^3$  (c and d), and number of branches per plant between two varieties of canola in 2015. Soil cone diameter and  $\tau D^3$  are calculated based on 0.5 mm root diameter classification (a and c) and 1mm root diameter classification (b and d). Vertical bars above mean values indicate standard error of three replications. Significant differences between two irrigation regimes or between two varieties were not found according to LSD (0.05).

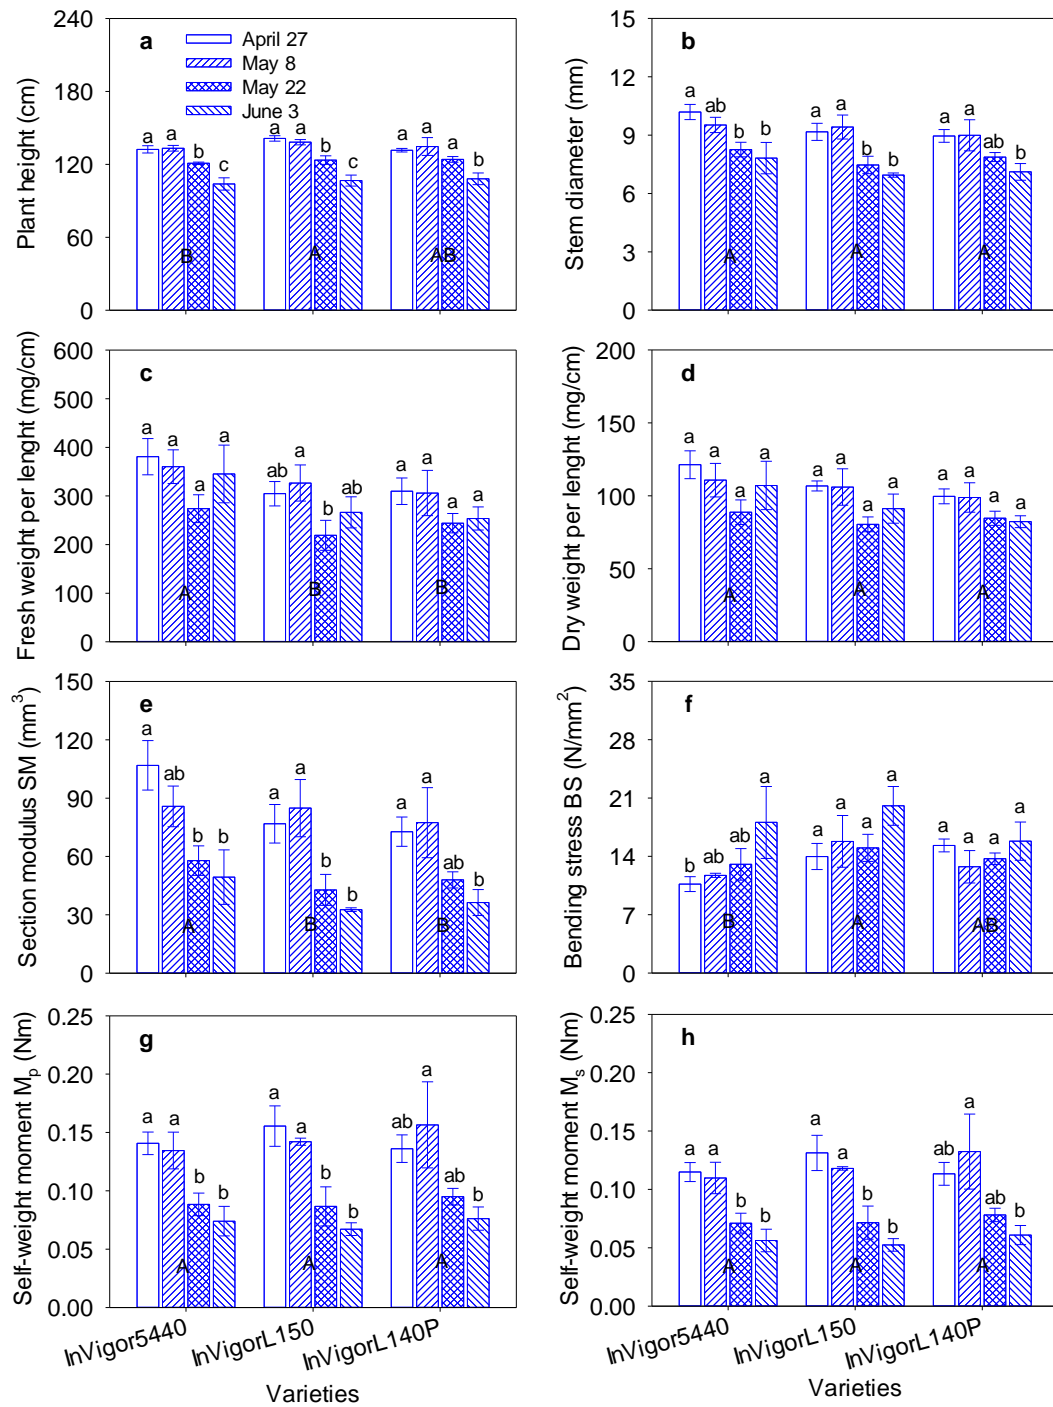

**Fig. S4.** Effect of sowing date on plant height (a), stem diameter (b), fresh weight per length (c), dry weight per length (d), section modulus (e), bending stress (f), self-weight moment  $M_p$  (g) and self-weight moment  $M_s$  (h) between three varieties of canola in 2015. Vertical bars above mean values indicate standard error of three replications. Means with different small alphabetical letters show the significant differences between four planting dates for each variety according to LSD (0.05). Means with different capital alphabetical letters show the significant differences between three varieties according to LSD (0.05).

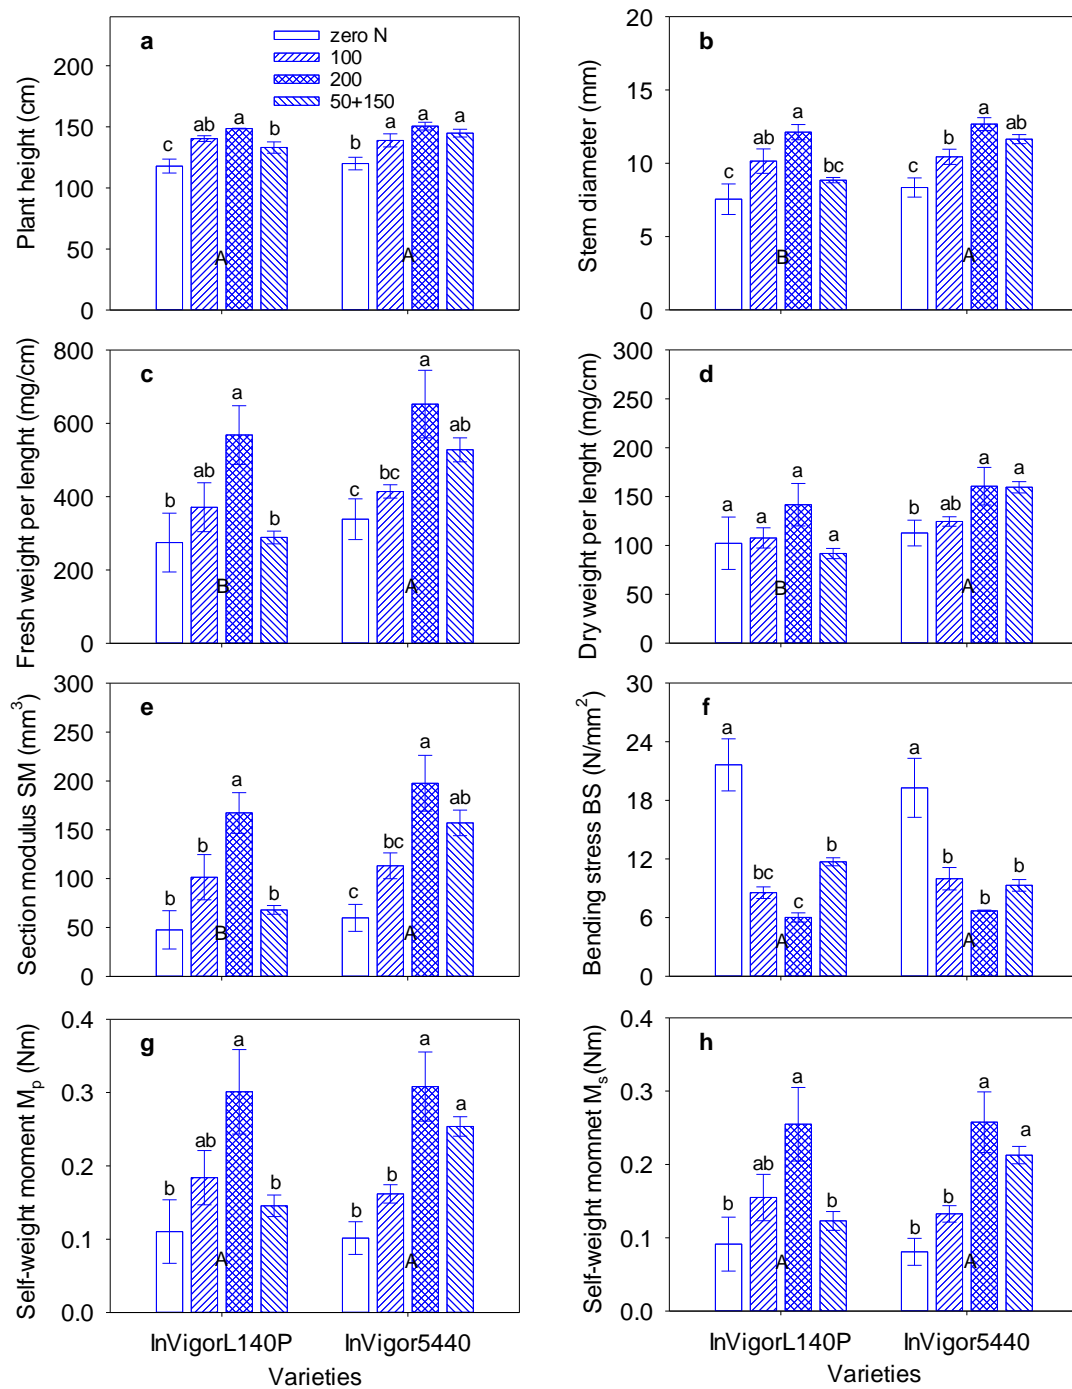

**Fig. S5.** Effect of N fertilizer management on plant height (a), stem diameter (b), fresh weight per length (c), dry weight per length (d), section modulus (e), bending stress (f), self-weight moment  $M_p$  (g) and self-weight moment  $M_s$  (h) between two varieties of canola in 2015. Vertical bars above mean values indicate standard error of three replications. Means with different small alphabetical letters show the significant differences between four N fertilizer managements for each variety according to LSD (0.05). Means with different capital letters show the significant differences between two varieties according to LSD (0.05).

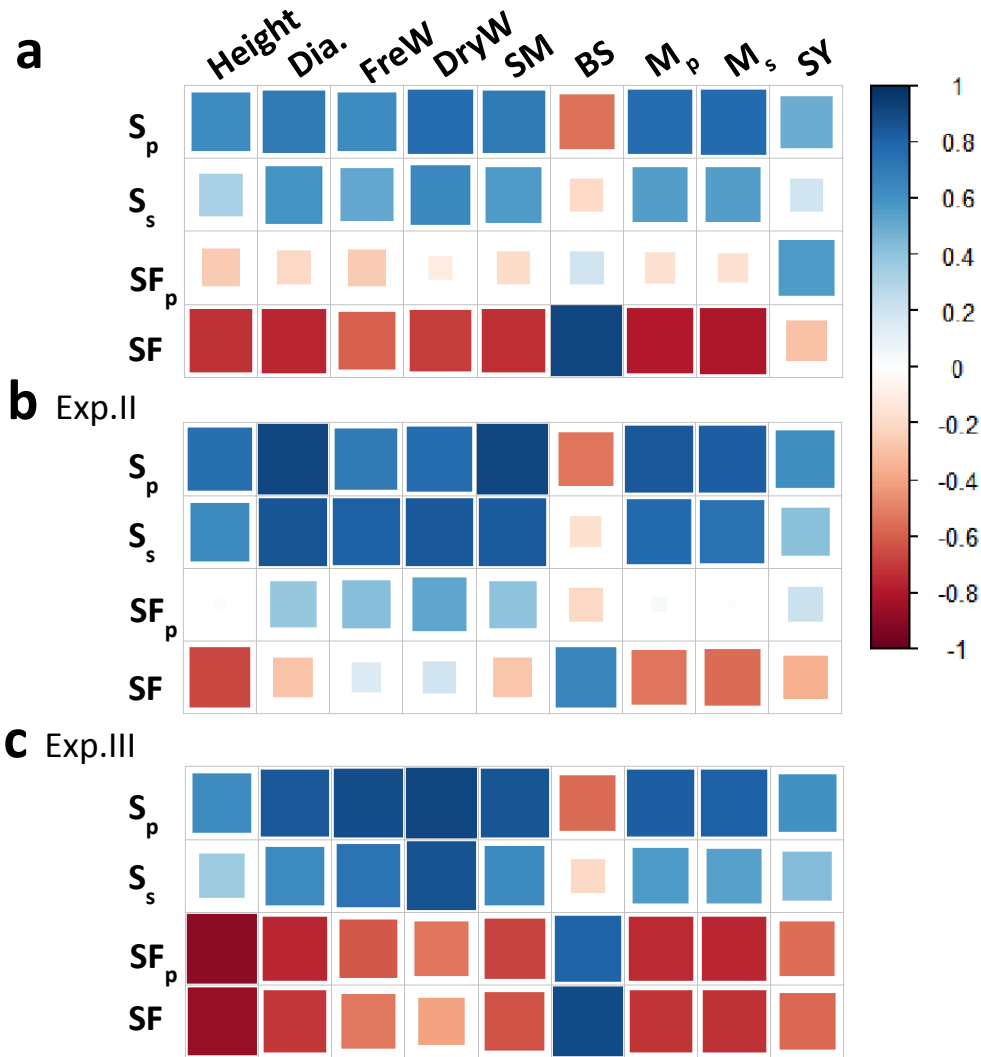

**Fig. S6.** Colour map for the relationship of four important lodging-related parameters ( $S_p$ , root anchorage strength,  $S_s$ : stem bending strength,  $SF_p$ : root safety factor,  $SF_r$ : stem safety factor) with plant height, basal stem diameter (Dia.), fresh weight per length (FreW), dry weigh per length (DryW), section modulus (SM), bending stress (BS), self-weight moment for root ( $M_p$ ), self-weight moment for stem ( $M_s$ ) and seed yield (SY). High colour density and larger square area indicates strong relationship. Blue and red colour represents positive and negative relationship, respectively

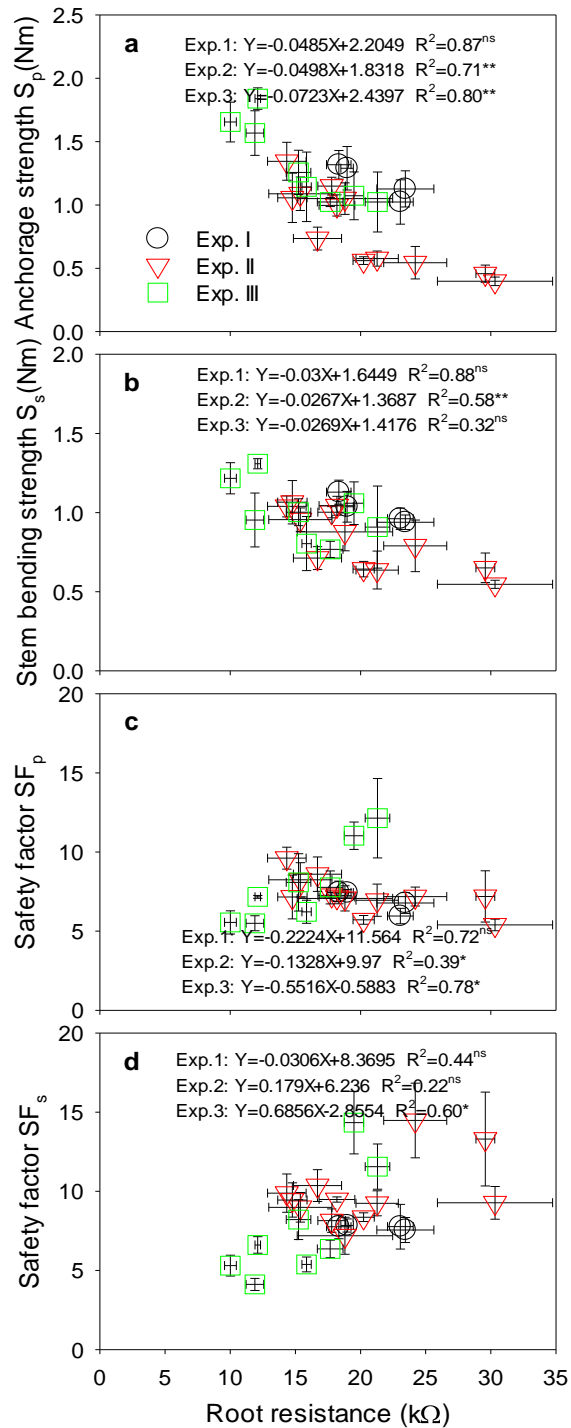

**Fig. S7.** Relationship of root resistance with anchorage strength (a), stem bending strength (b), root safety factor  $SF_p$  (c) and stem safety factor  $SF_s$  (d) among three field experiments in 2015. \*\* indicates significant at  $p \leq 0.01$ ; \* indicates significant at  $p \leq 0.05$ ; ns indicates non-significant.

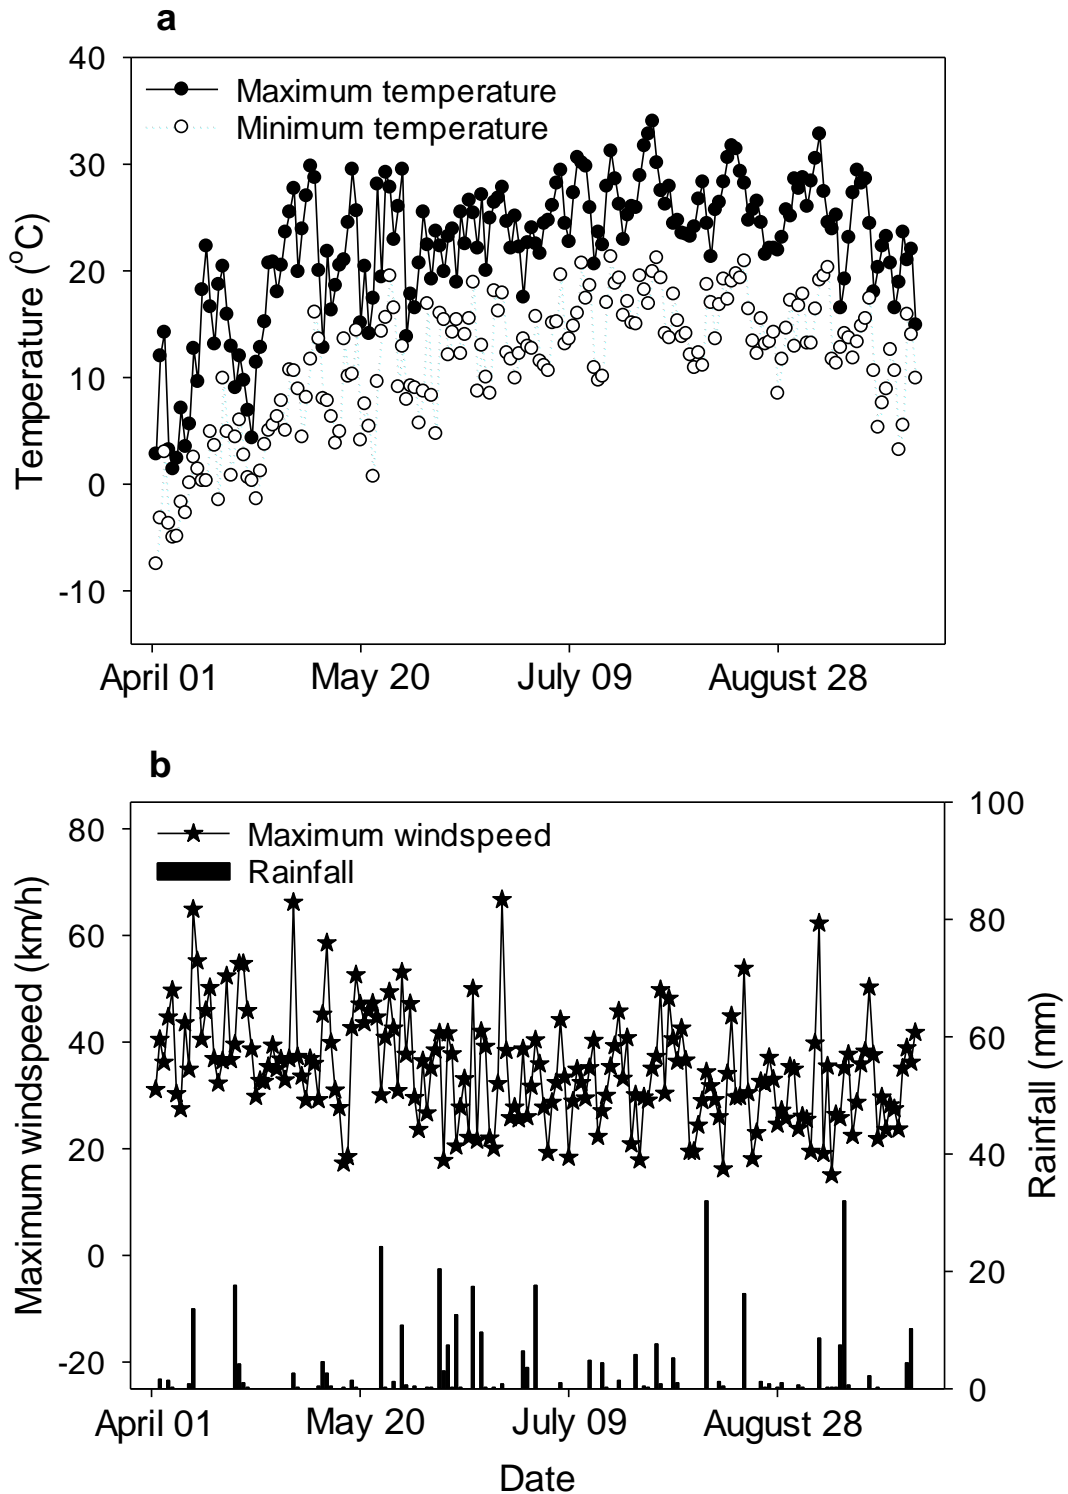

**Fig. S8.** Daily maximum temperature, minimum temperature, maximum windspeed, and rainfall during the growing season in 2015 at Central Experimental Farm of Agriculture and Agri-Food Canada, Ottawa, ON



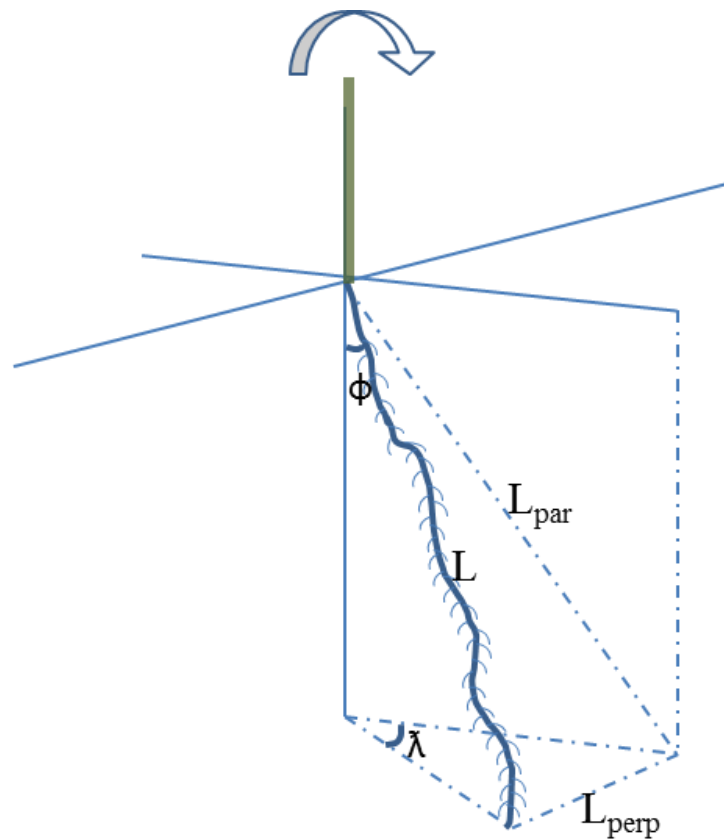

**Fig. S9.** Diagram showing the geometrical relationships between the root length ( $L$ ) and projected length of a lateral root along the plane of lodging ( $L_{\text{par}}$ ), and projected length from vertical of the plane of lodging ( $L_{\text{perp}}$ ) during the root–soil cone rotation. The root has length of  $L$ , and is orientated at an angle of  $\phi$ , to the vertical and at an angle of  $\lambda$ , to the cone of root lodging. This Figure is revised according to Ennos et al. (1991)

**Table S1.** Analysis of variance for all measurements including root capacitance (C), resistance (R), impedance (Z), root length per plant (L), surface area per plant (A), volume per plant (V), root dry weight per plant (DryR), plant height (H), height of the centre of gravity of total plant ( $h_p$ ), height of the centre of gravity of stem ( $h_s$ ), basal stem diameter (Dia), fresh weight of 20 cm basal internode per length (FreW) and dry weight of 20 cm basal internode per length (DryW), section modulus (SM), bending stress (BS), self-moment for total plant ( $M_p$ ), self-moment for stem ( $M_s$ ), root anchorage strength ( $S_p$ ), stem bending strength ( $S_s$ ), root safety factor ( $SF_p$ ), stem safety factor ( $SF_s$ ) and seed yield (SY) across all treatments for the three experiments in 2015

| Source                | C  | R  | Z  | L  | A  | V  | DryR | H  | $h_p$ | $h_s$ | Dia | FreW | DryW | SM | BS | $M_p$ | $M_s$ | $S_p$ | $S_s$ | $SF_p$ | $SF_s$ | SY |
|-----------------------|----|----|----|----|----|----|------|----|-------|-------|-----|------|------|----|----|-------|-------|-------|-------|--------|--------|----|
| <b>Experiment I</b>   |    |    |    |    |    |    |      |    |       |       |     |      |      |    |    |       |       |       |       |        |        |    |
| Irrigation (I)        | *  | ns | ns | ns | *  | *  | *    | ns | ns    | ns    | ns  | ns   | ns   | ns | ns | ns    | ns    | ns    | *     | ns     | ns     | ns |
| Variety (V)           | ns | ns | ns | *  | ns | ns | ns   | ns | ns    | ns    | ns  | ns   | ns   | ns | ns | ns    | ns    | ns    | ns    | ns     | ns     | ns |
| I × V                 | ns | ns | ns | ns | ns | ns | ns   | ns | ns    | ns    | ns  | ns   | ns   | ns | ns | ns    | ns    | ns    | ns    | ns     | ns     | ns |
| <b>Experiment II</b>  |    |    |    |    |    |    |      |    |       |       |     |      |      |    |    |       |       |       |       |        |        |    |
| Planting data (PD)    | ** | ** | ** | -  | -  | -  | -    | *  | *     | *     | **  | *    | *    | ** | ns | **    | **    | **    | **    | *      | ns     | ** |
| Variety (V)           | ns | *  | *  | -  | -  | -  | -    | ns | ns    | ns    | ns  | *    | ns   | ns | ns | ns    | ns    | ns    | ns    | *      | ns     | ns |
| PD × V                | ns | ns | ns | -  | -  | -  | -    | ns | ns    | ns    | ns  | ns   | ns   | ns | ns | ns    | ns    | ns    | ns    | ns     | ns     | ns |
| <b>Experiment III</b> |    |    |    |    |    |    |      |    |       |       |     |      |      |    |    |       |       |       |       |        |        |    |
| Fertilizer (F)        | ** | ** | ** | -  | -  | -  | -    | ** | **    | **    | **  | *    | ns   | *  | ** | ns    | **    | *     | ns    | *      | **     | ** |
| Variety (V)           | ** | ** | ** | -  | -  | -  | -    | ns | ns    | ns    | **  | *    | **   | ** | ns | ns    | ns    | ns    | *     | ns     | **     | ns |
| F × V                 | ** | ** | ** | -  | -  | -  | -    | ns | ns    | ns    | ns  | ns   | ns   | ns | ns | ns    | *     | ns    | ns    | ns     | ns     | ns |

Levels of significance indicated: ns = not significant, \* significant at  $p \leq 0.05$ , \*\*significant at  $p \leq 0.01$ .

**Table S2.** The explanations for abbreviations

| Abbrev. | Explanations                                                                                                                                                | Abbrev.                        | Explanations                                                                                                                          |
|---------|-------------------------------------------------------------------------------------------------------------------------------------------------------------|--------------------------------|---------------------------------------------------------------------------------------------------------------------------------------|
| SDI     | subsurface drip irrigation                                                                                                                                  | $M_p$                          | self-moment for total plant (Nm)                                                                                                      |
| N       | nitrogen                                                                                                                                                    | $M_s$                          | self-moment for shoot (Nm)                                                                                                            |
| C       | root capacitance (nF)                                                                                                                                       | $S_p$                          | root anchorage strength (Nm)                                                                                                          |
| R       | root resistance (k $\Omega$ )                                                                                                                               | $S_s$                          | stem bending strength (Nm)                                                                                                            |
| Z       | root impedance (k $\Omega$ )                                                                                                                                | SF                             | safety factor; a dimensionless parameter                                                                                              |
| L       | root length per plant (cm)                                                                                                                                  | $SF_p$                         | safety factor against anchorage failure                                                                                               |
| A       | root surface area per plant (cm <sup>2</sup> )                                                                                                              | $SF_s$                         | safety factor against stem buckling                                                                                                   |
| V       | root volume per plant (cm <sup>3</sup> )                                                                                                                    | $\tau$                         | soil shear strength (N m <sup>-2</sup> )                                                                                              |
| DryR    | root dry weight per plant (g)                                                                                                                               | SY                             | seed yield per plant (g plant <sup>-1</sup> )                                                                                         |
| H       | plant height (cm)                                                                                                                                           | $\rho_{root}$                  | the electrical resistivity of the root interface                                                                                      |
| $h_p$   | height of the centre of gravity of total plant (cm)                                                                                                         | $\xi$                          | the dimensionless coefficient assessing the effect on mutual electric shielding of roots                                              |
| $h_s$   | height of the centre of gravity of shoot (cm)                                                                                                               | K                              | dimensionless constant, to link $\tau$ and root-soil cone diameter with $S_p$                                                         |
| g       | the acceleration owing to gravity (N kg <sup>-1</sup> )                                                                                                     | $M_b/m_b$                      | root resistance to being bent strength (Nm)                                                                                           |
| Dia/D/r | diameter (cm)                                                                                                                                               | $M_a$                          | root resistance to axial motion strength (Nm)                                                                                         |
| FreW    | basal fresh weight of 20 cm internode per length (g cm <sup>-1</sup> )                                                                                      | $\phi, \lambda, \beta, \alpha$ | angle of inclination                                                                                                                  |
| DryW    | basal dry weight of 20 cm internode per length (g cm <sup>-1</sup> )                                                                                        | F/f                            | maximum force (N) withstanding before fails                                                                                           |
| SM      | section modulus for basal stem (mm <sup>3</sup> )                                                                                                           | k                              | the reciprocal of the distance (mm) between the supports in the three-point bending test                                              |
| $m_s$   | fresh weight of shoot                                                                                                                                       | $\epsilon_i$                   | dielectric constant; a ratio of the permittivity of a substance to the permittivity of free space                                     |
| $m_p$   | fresh weight of total plant (g)                                                                                                                             | $\zeta$                        | the dimensionless coefficient that indicates a negative error in assessing absorbing root surfaces caused by electric current flowing |
| BS      | bending stress of basal stem (N/mm <sup>2</sup> ); a mechanical parameter for lodging resistance that is influenced by the chemical composition of the culm | $\eta$                         | the dimensionless coefficient that represents the effect of the possible mechanical injury of roots                                   |

**Table S3.** Soil chemical properties of the top 0–30 cm layer in three field experiments in 2015 at Central Experimental Farm of Agriculture and Agri–Food Canada, Ottawa, ON

| Parameters                                     | Exp. I       | Exp. II               | Exp. III              |
|------------------------------------------------|--------------|-----------------------|-----------------------|
| Soil classification                            | Uplands sand | North Gower clay loam | North Gower clay loam |
| SOM <sup>a</sup> (g kg <sup>-1</sup> )         | 4.0          | 3.8                   | 4.3                   |
| pH                                             | 6.5          | 6.7                   | 7.2                   |
| Total CEC <sup>b</sup> (meq kg <sup>-1</sup> ) | 70           | 190                   | 220                   |
| Available P (ppm)                              | 47           | 45                    | 35                    |
| Available K (ppm)                              | 60           | 190                   | 240                   |
| Available Ca (ppm)                             | 1300         | 2800                  | 3400                  |
| Available Mg (ppm)                             | 110          | 560                   | 460                   |
| Available Na (ppm)                             | 10           | 30                    | 30                    |

<sup>a</sup>SOM = Soil organic matter; <sup>b</sup>CEC= Cation exchange capacity
